# Supplementary material for: TMAO perturbs intermolecular vibrational motions of water revealed by low-frequency modes
Source: Royal Society of Chemistry journal article supplement (doi:10.1039/d4cp01025f), 2024-01-01
Supplement: d4cp01025f1.pdf [file d4cp01025f1.pdf]

Supporting Information for

## TMAO Perturbs

# Intermolecular Vibrational Motions of Water

## Revealed by the Low-frequency Modes

*Tsung-Han Liu, Masanari Okuno\**

*Department of Basic Science, Graduate School of Arts and Sciences,  
The University of Tokyo, 3-8-1 Komaba, Meguro, Tokyo 153-8902 Japan*

### Table of Contents

1. Polarized HR spectra of water and TBA aqueous solutions.
2. HR spectra of heavy water and urea aqueous solutions in D<sub>2</sub>O.
3. HR spectra of TMAO, TBA, and urea aqueous solutions at 0.5 M, and water measured at different temperatures.
4. Summary of vibrational modes and frequencies of water in TBA and urea solutions.

## 1. Polarized HR spectra of water and TBA aqueous solutions.

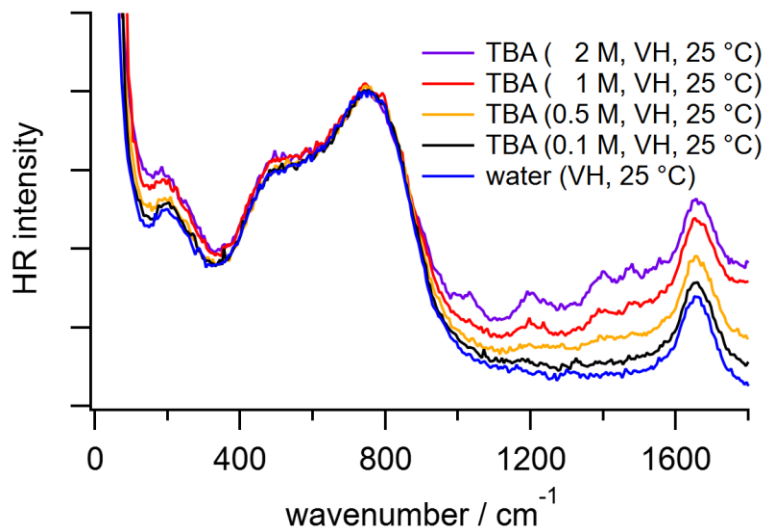

**Figure S1.** Polarized HR spectra of water (blue) and TBA aqueous solutions at 0.1 M (black), 0.5 M (orange), 1 M (red), and 2 M (purple) measured at 25 °C. The polarization directions are vertical (V) for the incident light and horizontal (H) for the scattered light at 90°, respectively, referred as VH.

## 2. HR spectra of heavy water and urea aqueous solutions in D<sub>2</sub>O.

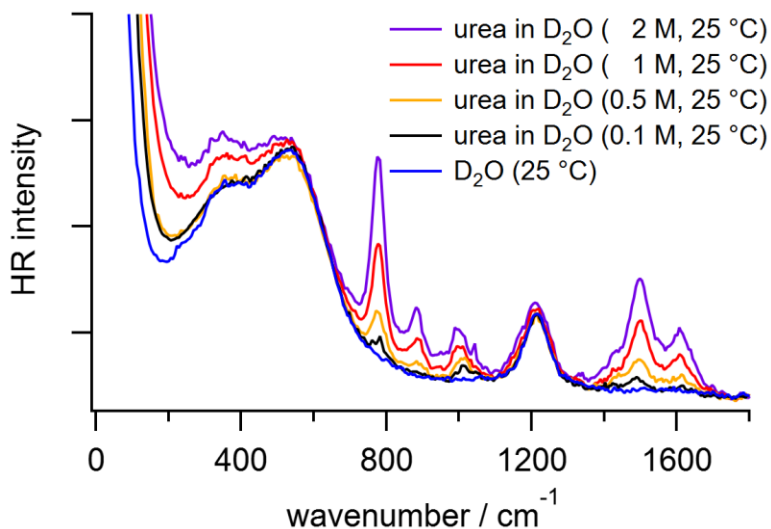

**Figure S2.** HR spectra of heavy water (blue) and urea aqueous solutions in D<sub>2</sub>O at 0.1 M (black), 0.5 M (orange), 1 M (red), and 2 M (purple) measured at 25 °C.

All librational and vibrational bands of water downshift due to the isotope effect compared with those in H<sub>2</sub>O. In the HR spectrum of D<sub>2</sub>O, the DOD bending band and the librational bands are located around 1210, 550 and 360 cm<sup>-1</sup>, respectively.<sup>S1</sup> The intense intramolecular vibrational band ascribed to the CO wagging mode around 780 cm<sup>-1</sup> becomes distinguishable even at 0.1 M. A band assigned to a coupling between the CN symmetric stretching and the ND<sub>2</sub> rocking modes newly appears around 890 cm<sup>-1</sup>.<sup>S2</sup>

**3. HR spectra of TMAO, TBA, and urea aqueous solutions at 0.5 M, and water measured at different temperatures.**

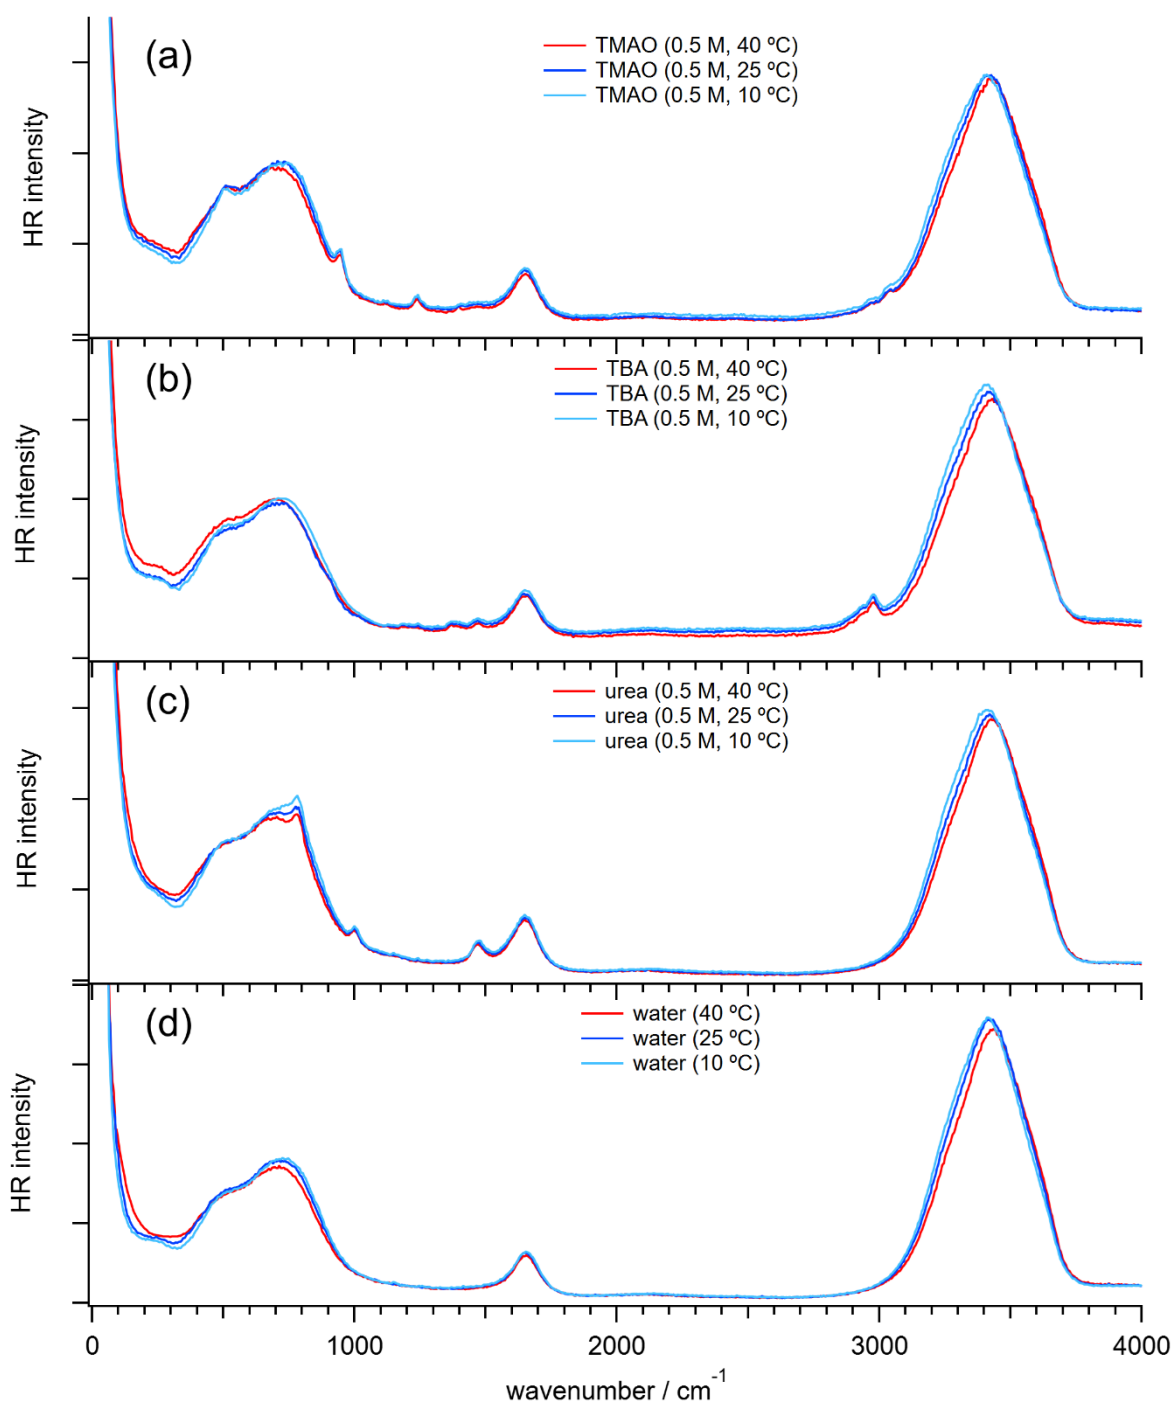

**Figure S3.** HR spectra of TMAO (a), TBA (b), and urea (c) aqueous solutions at 0.5 M, and water (d) measured at 10 °C (light blue), 25 °C (dark blue), and 40 °C (red).

#### 4. Summary of vibrational modes and frequencies of water in TBA and urea solutions.

**Table S1 Vibrational modes and frequencies of water in TBA solutions.**

| concentration / M | HB / $\text{cm}^{-1}$ | L1 / $\text{cm}^{-1}$ | L2 / $\text{cm}^{-1}$ | HOH bend / $\text{cm}^{-1}$ | OH stretch / $\text{cm}^{-1}$ |
|-------------------|-----------------------|-----------------------|-----------------------|-----------------------------|-------------------------------|
| 0                 |                       | 479                   | 718                   | 1650                        | 3419                          |
| 0.1               | 254                   | 476                   | 722                   | 1650                        | 3419                          |
| 0.5               | 247                   | 479                   | 729                   | 1647                        | 3414                          |
| 1                 | 259                   | 487                   | 732                   | 1651                        | 3414                          |

**Table S2 Vibrational modes and frequencies of water in urea solutions.**

| concentration / M | L1 / $\text{cm}^{-1}$ | L2 / $\text{cm}^{-1}$ | HOH bend / $\text{cm}^{-1}$ | OH stretch / $\text{cm}^{-1}$ |
|-------------------|-----------------------|-----------------------|-----------------------------|-------------------------------|
| 0                 | 482                   | 718                   | 1650                        | 3419                          |
| 0.1               | 476                   | 715                   | 1650                        | 3419                          |
| 0.5               | 479                   | 715                   | 1648                        | 3420                          |
| 1                 | 480                   | 718                   | 1647                        | 3421                          |

## References

- [S1] Korepanov, V.; Yu, C.-C.; Hamaguchi, H., Hyper-Raman investigation of intermolecular vibrations of water and ice. *J. Raman Spectrosc.* **2018**, *49* (11), 1742–1746.
- [S2] Keuleers, R.; Desseyn, H. O.; Rousseau, B.; Alsenoy, C. V., Vibrational Analysis of Urea. *J. Phys. Chem. A* **1999**, *103* (24), 4621-4630.
